# Supplementary material for: Assessing the Psychometric Properties of the Comprehensive Inventory of Mindfulness Experiences (CHIME) Using Rasch Analysis
Source: Atypon-hosted journal article supplement (doi:10.1027/1015-5759/a000453), 2018-02-16

### Relativity

(Grouping Set to Interval Length of 0.50 making 22 Groups)

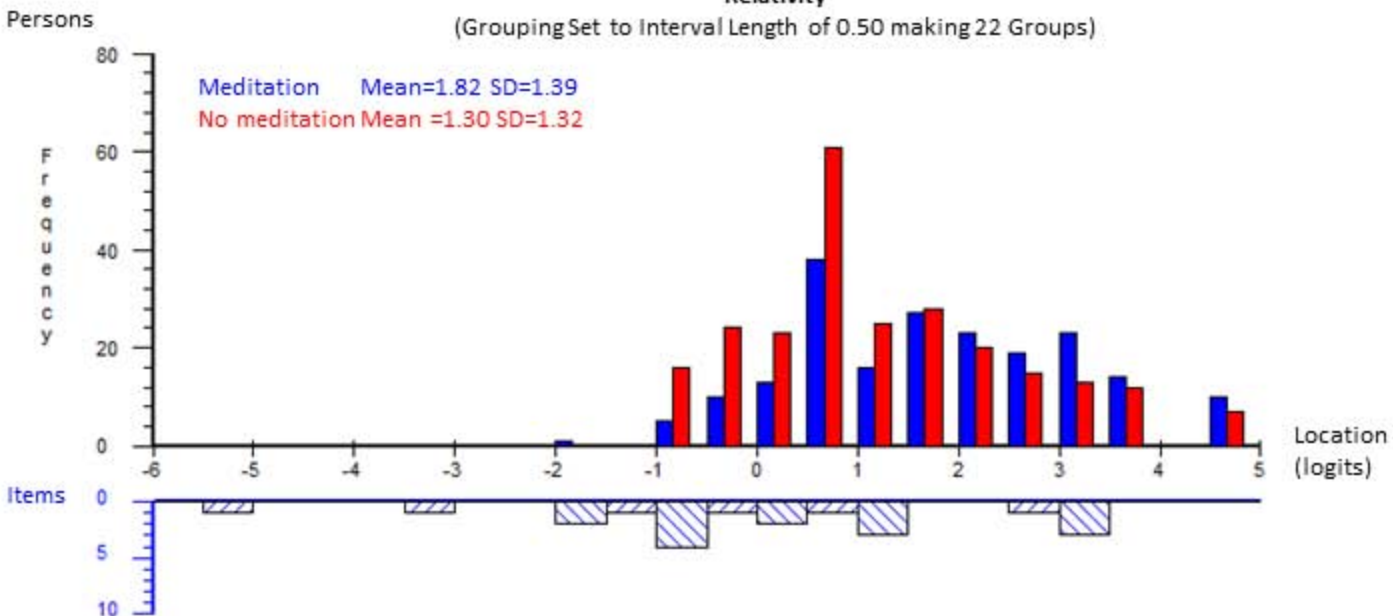

### Insight

(Grouping Set to Interval Length of 0.50 making 16 Groups)

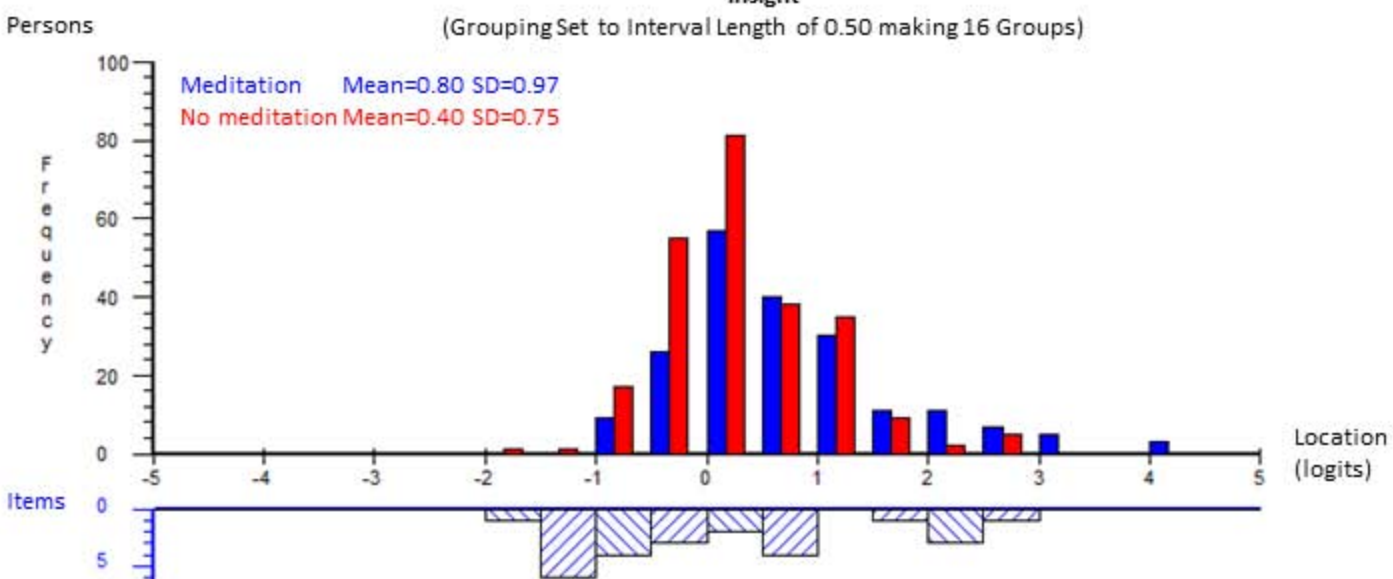

### CHIME Full Scale

(Grouping Set to Interval Length of 0.10 making 40 Groups)

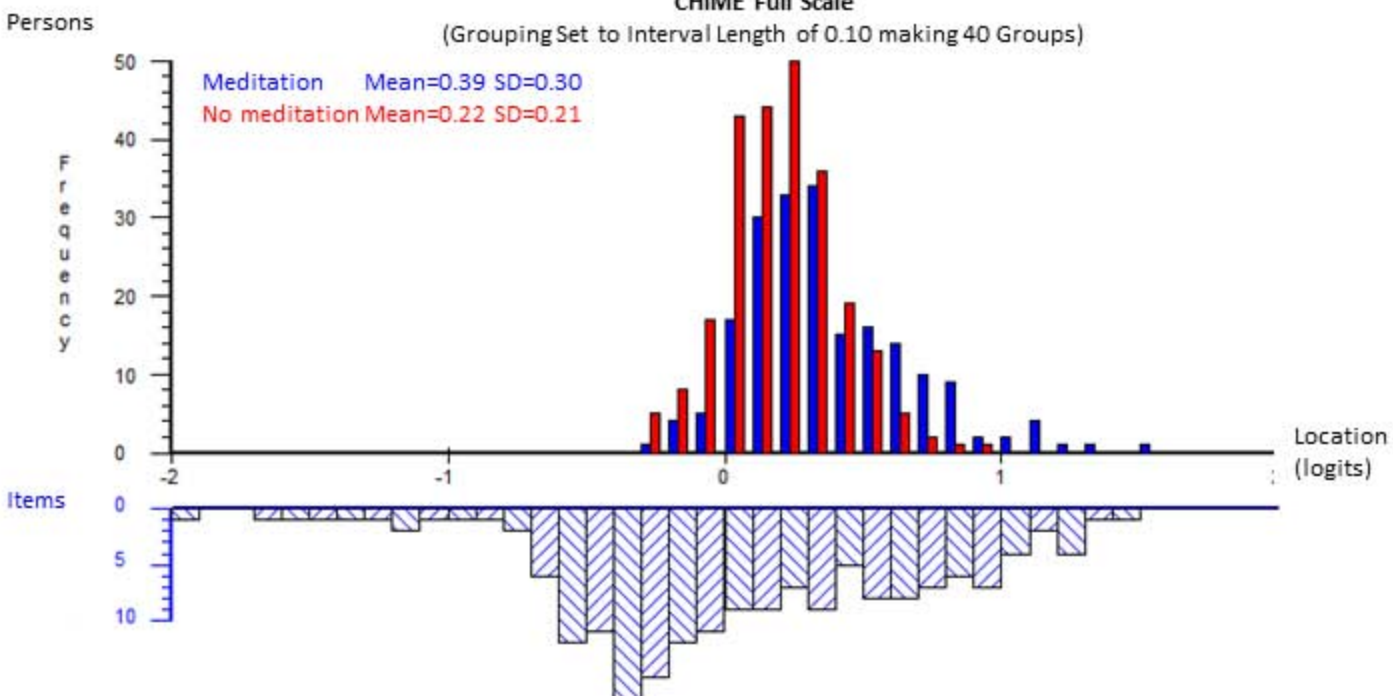

Supplement: 1015-5759_a000453_esm10.pdf [file 1015-5759_a000453_esm10.pdf]
