# Supplementary material for: Assessing the Psychometric Properties of the Comprehensive Inventory of Mindfulness Experiences (CHIME) Using Rasch Analysis
Source: Atypon-hosted journal article supplement (doi:10.1027/1015-5759/a000453), 2018-02-16
Supplement: 1015-5759_a000453_esm11.pdf [file 1015-5759_a000453_esm11.pdf]

## **ESM 11 Description of the Rasch analyses RUMM2030 outputs**

ESM 11 file includes RUMM2030 software outputs of the Rasch analysis for the overall fit statistics of individual CHIME subscales and the total scale together with outputs for the initial item item's fit statistics. The same acronyms are used consistently as defined in the body of the manuscript.

ESM 11 includes RUMM outputs presented in the following order (one output per page):

1. ESM 11 RUMM 2030 Output CHIME Initial Full scale
2. ESM 11 RUMM 2030 Output CHIME Final Full scale
3. ESM 11 RUMM 2030 Output CHIME AwareInt Initial-Final scale
4. ESM 11 RUMM 2030 Output CHIME AwareInt Items Fit Initial scale
5. ESM 11 RUMM 2030 Output CHIME AwareExt Initial scale
6. ESM 11 RUMM 2030 Output CHIME AwareExt Items Fit Initial scale
7. ESM 11 RUMM 2030 Output CHIME ActAware Initial-Final scale
8. ESM 11 RUMM 2030 Output CHIME ActAware Items Fit Initial scale
9. ESM 11 RUMM 2030 Output CHIME AccNJ Initial-Final scale
10. ESM 11 RUMM 2030 Output CHIME AccNJ Items Fit Initial scale
11. ESM 11 RUMM 2030 Output CHIME NrDec Initial-Final scale
12. ESM 11 RUMM 2030 Output CHIME NrDec Items Fit Initial scale
13. ESM 11 RUMM 2030 Output CHIME Openness Initial-Final scale
14. ESM 11 RUMM 2030 Output CHIME Openness Items Fit Initial scale
15. ESM 11 RUMM 2030 Output CHIME Relativity Initial-Final scale
16. ESM 11 RUMM 2030 Output CHIME Relativity Item Fit Initial scale
17. ESM 11 RUMM 2030 Output CHIME Insight Initial scale
18. ESM 11 RUMM 2030 Output CHIME Insight Items Fit Initial scale
19. ESM 11 RUMM 2030 Output CHIME Insight Final scale

The overall Rasch model fit statistics from the above outputs are summarised in Table 1 and the individual item fit statistics in Table ESM 1. Both the overall and individual model fit indices are explained in sufficient details in the method and result sections of the manuscript.







RUMM2030

Project: CHIME443G

Analysis: A2

Title: AWINT

Date: 1 Jun 2017 04:38:05 p.m.

Display: INDIVIDUAL ITEM-FIT - Serial Order

---

| Seq | Item  | Type | Location | SE    | Residual | DF     | ChiSq  | DF | Prob     | F-stat | DF1 | DF2 | Prob     |
|-----|-------|------|----------|-------|----------|--------|--------|----|----------|--------|-----|-----|----------|
| 1   | I0001 | Poly | -0.748   | 0.061 | 0.042    | 340.20 | 9.292  | 9  | 0.410773 | 1.209  | 9   | 420 | 0.287293 |
| 5   | I0005 | Poly | 0.490    | 0.050 | 1.024    | 340.20 | 11.697 | 9  | 0.230921 | 1.426  | 9   | 420 | 0.174326 |
| 14  | I0014 | Poly | -0.209   | 0.061 | 0.510    | 340.20 | 5.637  | 9  | 0.775629 | 0.722  | 9   | 420 | 0.689114 |
| 29  | I0029 | Poly | 0.651    | 0.050 | 1.561    | 340.20 | 13.413 | 9  | 0.144802 | 1.699  | 9   | 420 | 0.086958 |
| 34  | I0034 | Poly | -0.185   | 0.066 | -0.796   | 340.20 | 17.002 | 9  | 0.048684 | 2.588  | 9   | 420 | 0.006524 |

---

RUMM2030 Project: CHIME443G Analysis: AEX  
Title: INITIAL Date: 1 Jun 2017 16:46:56  
Display: SUMMARY TEST-OF-FIT STATISTICS

ITEM-PERSON INTERACTION

|                             | ITEMS    |              | PERSONS  |              |
|-----------------------------|----------|--------------|----------|--------------|
|                             | Location | Fit Residual | Location | Fit Residual |
| Mean                        | 0.0000   | 0.1849       | 1.5501   | -0.4842      |
| SD                          | 0.2159   | 2.2216       | 1.4540   | 1.1944       |
| Skewness                    | 0.0582   | -0.1947      | -0.0480  | -0.8763      |
| Kurtosis                    | -4.0298  | -2.1535      | -0.0035  | 0.7399       |
|                             | N = 443  |              |          |              |
| Correlation [locn/stdResid] |          |              | 0.9256   | 0.1240       |

ITEM-TRAIT INTERACTION

Total Item Chi Squ 43.3832  
Total Deg of Freedom 36.000  
Total Chi Squ Prob 0.185584

RELIABILITY INDICES

PERSON SEPARATION INDEX

AEX

With Extm: 0.74751  
NO Extm: 0.72666

CRONBACH Alpha

AEX

With Extm: 0.82261  
NO Extm: 0.79535

POWER OF ANALYSIS OF FIT is GOOD

[Based on Separation Index of: 0.74751]

RUMM2030

Project: CHIME443G

Analysis: AEX

Date: 1 Jun 2017 04:47:52 p.m.

Title: INITIAL

Display: INDIVIDUAL ITEM-FIT - Serial Order

| Seq | Item  | Type | Location | SE    | Residual | DF     | ChiSq  | DF | Prob     | F-stat | DF1 | DF2 | Prob     |
|-----|-------|------|----------|-------|----------|--------|--------|----|----------|--------|-----|-----|----------|
| 9   | I0009 | Poly | -0.226   | 0.064 | -2.561   | 309.00 | 15.689 | 9  | 0.073674 | 2.782  | 9   | 407 | 0.003570 |
| 18  | I0018 | Poly | 0.234    | 0.060 | 1.599    | 309.00 | 7.530  | 9  | 0.582159 | 0.914  | 9   | 407 | 0.512929 |
| 21  | I0021 | Poly | 0.127    | 0.063 | 2.331    | 309.00 | 9.830  | 9  | 0.364442 | 1.094  | 9   | 407 | 0.365788 |
| 27  | I0027 | Poly | -0.135   | 0.064 | -0.629   | 309.00 | 10.335 | 9  | 0.324041 | 1.454  | 9   | 407 | 0.162854 |





RUMM2030 Project: CHIME443G Analysis: ACA  
Title: INITIAL Date: 1 Jun 2017 17:01:44  
Display: INDIVIDUAL ITEM-FIT - Serial Order

| Seq | ItmCode | Type | Location | SE    | Fit    | Residual | DF     | ChiSqu | DF | Prob     | F-stat | DF1 | DF2 | Prob     |
|-----|---------|------|----------|-------|--------|----------|--------|--------|----|----------|--------|-----|-----|----------|
| 10  | I0010   | Poly | -0.151   | 0.048 | 2.099  |          | 324.75 | 5.541  | 9  | 0.784874 | 0.628  | 9   | 428 | 0.773742 |
| 12  | I0012   | Poly | -0.472   | 0.057 | 0.705  |          | 324.75 | 16.947 | 9  | 0.049549 | 2.435  | 9   | 428 | 0.010432 |
| 17  | I0017   | Poly | 0.451    | 0.050 | -0.333 |          | 324.75 | 12.387 | 9  | 0.192362 | 1.943  | 9   | 428 | 0.044507 |
| 26  | I0026   | Poly | 0.172    | 0.051 | -0.859 |          | 324.75 | 9.028  | 9  | 0.434713 | 1.507  | 9   | 428 | 0.142660 |



RUMM2030

Project: CHIME443G

Analysis: ACNJ

Date: 1 Jun 2017 05:06:42 p.m.

Title: INITIAL

Display: INDIVIDUAL ITEM-FIT - Serial Order

| Seq | Item  | Type | Location | SE    | Residual | DF     | ChiSq  | DF | Prob     | F-stat | DF1 | DF2 | Prob     |
|-----|-------|------|----------|-------|----------|--------|--------|----|----------|--------|-----|-----|----------|
| 2   | I0002 | Poly | -0.626   | 0.062 | -0.038   | 348.20 | 4.459  | 9  | 0.878690 | 0.626  | 9   | 430 | 0.775110 |
| 7   | I0007 | Poly | 0.936    | 0.055 | 1.862    | 348.20 | 18.505 | 9  | 0.029748 | 2.290  | 9   | 430 | 0.016176 |
| 11  | I0011 | Poly | -0.442   | 0.061 | 1.402    | 348.20 | 9.616  | 9  | 0.382438 | 1.193  | 9   | 430 | 0.297446 |
| 32  | I0032 | Poly | 0.058    | 0.059 | -0.971   | 348.20 | 12.209 | 9  | 0.201785 | 1.908  | 9   | 430 | 0.049103 |
| 36  | I0036 | Poly | 0.074    | 0.055 | -1.737   | 348.20 | 10.612 | 9  | 0.303274 | 1.793  | 9   | 430 | 0.067442 |



RUMM2030            Project: CHIME443G            Analysis: ND  
Title: INITIAL  
Display: INDIVIDUAL ITEM-FIT - Serial Order

Date: 1 Jun 2017 05:12:40 p.m.

| Seq | Item  | Type | Location | SE    | Residual | DF     | ChiSq | DF | Prob     | F-stat | DF1 | DF2 | Prob     |
|-----|-------|------|----------|-------|----------|--------|-------|----|----------|--------|-----|-----|----------|
| 8   | I0008 | Poly | 0.385    | 0.060 | 0.405    | 362.83 | 4.655 | 9  | 0.863293 | 0.626  | 9   | 430 | 0.775170 |
| 13  | I0013 | Poly | 0.362    | 0.060 | -0.827   | 362.83 | 8.976 | 9  | 0.439473 | 1.309  | 9   | 430 | 0.229913 |
| 16  | I0016 | Poly | -0.104   | 0.060 | 1.597    | 362.83 | 6.154 | 9  | 0.724434 | 0.738  | 9   | 430 | 0.674320 |
| 20  | I0020 | Poly | 0.178    | 0.060 | -0.312   | 362.83 | 7.979 | 9  | 0.536314 | 1.144  | 9   | 430 | 0.330286 |
| 25  | I0025 | Poly | -0.207   | 0.063 | -1.028   | 362.83 | 5.276 | 9  | 0.809643 | 0.799  | 9   | 430 | 0.617244 |
| 28  | I0028 | Poly | -0.614   | 0.066 | 0.944    | 362.83 | 4.970 | 9  | 0.836935 | 0.613  | 9   | 430 | 0.786143 |



RUMM2030            Project: CHIME443G            Analysis: OP  
Title: INITIAL  
Display: INDIVIDUAL ITEM-FIT - Serial Order

Date: 1 Jun 2017 05:15:38 p.m.

| Seq | Item  | Type | Location | SE    | Residual | DF     | ChiSq  | DF | Prob     | F-stat | DF1 | DF2 | Prob     |
|-----|-------|------|----------|-------|----------|--------|--------|----|----------|--------|-----|-----|----------|
| 19  | I0019 | Poly | -0.549   | 0.050 | 0.396    | 323.25 | 6.304  | 9  | 0.709128 | 0.882  | 9   | 426 | 0.540997 |
| 22  | I0022 | Poly | 0.149    | 0.053 | -0.552   | 323.25 | 9.629  | 9  | 0.381374 | 1.569  | 9   | 426 | 0.122262 |
| 30  | I0030 | Poly | 0.327    | 0.050 | 0.326    | 323.25 | 10.530 | 9  | 0.309290 | 1.488  | 9   | 426 | 0.149875 |
| 33  | I0033 | Poly | 0.074    | 0.049 | 1.950    | 323.25 | 6.480  | 9  | 0.691062 | 0.793  | 9   | 426 | 0.622834 |





RUMM2030

Project: CHIME443G

Analysis: REL

Date: 1 Jun 2017 05:20:13 p.m.

Title: INITIAL

Display: INDIVIDUAL ITEM-FIT - Serial Order

| Seq | Item  | Type | Location | SE    | Residual | DF     | ChiSq  | DF | Prob     | F-stat | DF1 | DF2 | Prob     |
|-----|-------|------|----------|-------|----------|--------|--------|----|----------|--------|-----|-----|----------|
| 4   | I0004 | Poly | -0.145   | 0.061 | 1.061    | 315.75 | 3.387  | 8  | 0.907809 | 0.357  | 9   | 416 | 0.954676 |
| 23  | I0023 | Poly | 0.370    | 0.060 | 1.575    | 315.75 | 9.868  | 8  | 0.274386 | 1.243  | 9   | 416 | 0.266767 |
| 31  | I0031 | Poly | 0.343    | 0.061 | -1.072   | 315.75 | 7.464  | 8  | 0.487477 | 0.918  | 9   | 416 | 0.508768 |
| 35  | I0035 | Poly | -0.569   | 0.064 | -0.201   | 315.75 | 15.721 | 8  | 0.046557 | 2.402  | 9   | 416 | 0.011595 |



RUMM2030 Project: CHIME443G Analysis: I1

Title: INITIAL

Date: 1 Jun 2017 05:29:29 p.m.

Display: INDIVIDUAL ITEM-FIT - Serial Order

| Seq | Item  | Type | Location | SE    | Residual | DF     | ChiSq  | DF | Prob     | F-stat | DF1 | DF2 | Prob     |
|-----|-------|------|----------|-------|----------|--------|--------|----|----------|--------|-----|-----|----------|
| 3   | I0003 | Poly | 0.162    | 0.052 | 3.237    | 348.20 | 22.224 | 9  | 0.008195 | 2.409  | 9   | 430 | 0.011292 |
| 6   | I0006 | Poly | 0.193    | 0.050 | 0.304    | 348.20 | 4.806  | 9  | 0.850920 | 0.571  | 9   | 430 | 0.821132 |
| 15  | I0015 | Poly | -0.234   | 0.056 | -1.119   | 348.20 | 11.065 | 9  | 0.271249 | 1.631  | 9   | 430 | 0.104052 |
| 24  | I0024 | Poly | -0.050   | 0.054 | -1.030   | 348.20 | 16.231 | 9  | 0.062215 | 2.526  | 9   | 430 | 0.007895 |
| 37  | I0037 | Poly | -0.070   | 0.060 | 0.387    | 348.20 | 6.388  | 9  | 0.700587 | 0.799  | 9   | 430 | 0.616995 |



## **ESM 11 Description of the Rasch analyses RUMM2030 outputs**

ESM 11 file includes RUMM2030 software outputs of the Rasch analysis for the overall fit statistics of individual CHIME subscales and the total scale together with outputs for the initial item item's fit statistics. The same acronyms are used consistently as defined in the body of the manuscript.

ESM 11 includes RUMM outputs presented in the following order (one output per page):

1. ESM 11 RUMM 2030 Output CHIME Initial Full scale
2. ESM 11 RUMM 2030 Output CHIME Final Full scale
3. ESM 11 RUMM 2030 Output CHIME AwareInt Initial-Final scale
4. ESM 11 RUMM 2030 Output CHIME AwareInt Items Fit Initial scale
5. ESM 11 RUMM 2030 Output CHIME AwareExt Initial scale
6. ESM 11 RUMM 2030 Output CHIME AwareExt Items Fit Initial scale
7. ESM 11 RUMM 2030 Output CHIME ActAware Initial-Final scale
8. ESM 11 RUMM 2030 Output CHIME ActAware Items Fit Initial scale
9. ESM 11 RUMM 2030 Output CHIME AccNJ Initial-Final scale
10. ESM 11 RUMM 2030 Output CHIME AccNJ Items Fit Initial scale
11. ESM 11 RUMM 2030 Output CHIME NrDec Initial-Final scale
12. ESM 11 RUMM 2030 Output CHIME NrDec Items Fit Initial scale
13. ESM 11 RUMM 2030 Output CHIME Openness Initial-Final scale
14. ESM 11 RUMM 2030 Output CHIME Openness Items Fit Initial scale
15. ESM 11 RUMM 2030 Output CHIME Relativity Initial-Final scale
16. ESM 11 RUMM 2030 Output CHIME Relativity Item Fit Initial scale
17. ESM 11 RUMM 2030 Output CHIME Insight Initial scale
18. ESM 11 RUMM 2030 Output CHIME Insight Items Fit Initial scale
19. ESM 11 RUMM 2030 Output CHIME Insight Final scale

The overall Rasch model fit statistics from the above outputs are summarised in Table 1 and the individual item fit statistics in Table ESM 1. Both the overall and individual model fit indices are explained in sufficient details in the method and result sections of the manuscript.
