# Supplementary figures and images for: Assessing the Psychometric Properties of the Comprehensive Inventory of Mindfulness Experiences (CHIME) Using Rasch Analysis
Source: Atypon-hosted journal article supplement (doi:10.1027/1015-5759/a000453), 2018-02-16

10001 Descriptor for Item 1    Locn = -0.748    Spread = 0.672    FitRes = 0.042    ChiSq[Pr] = 0.411    F[Pr] = 0.287

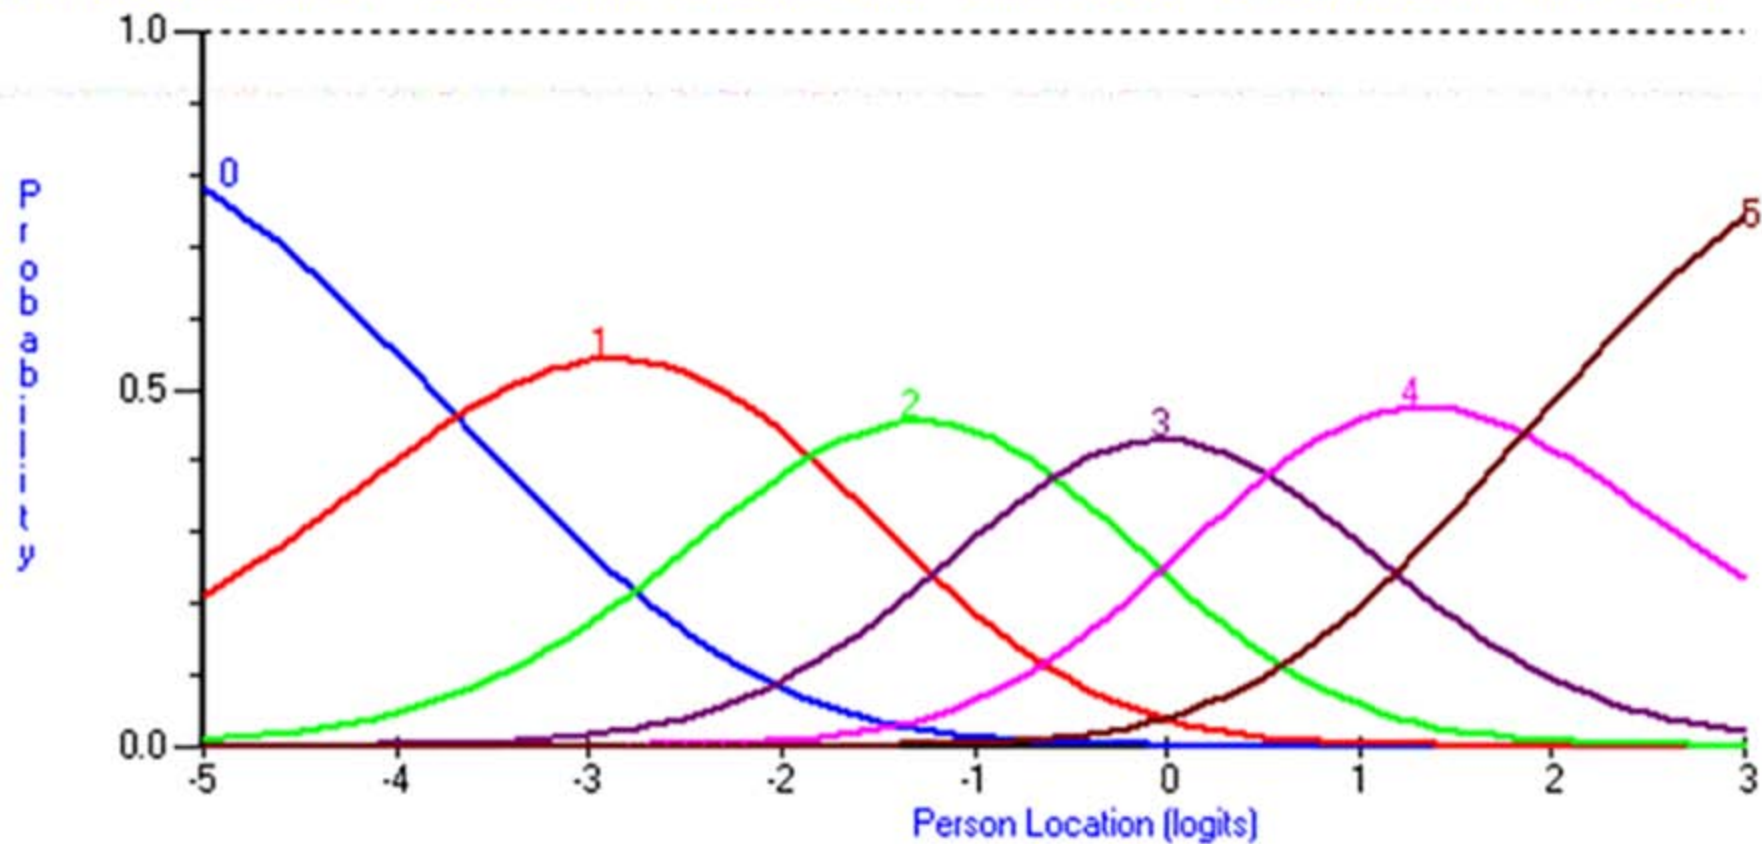

Supplement: 1015-5759_a000453_esm7.pdf [file 1015-5759_a000453_esm7.pdf]
